# Supplementary material for: Emission factors and light absorption properties of brown carbonfrom household coal combustion in China
Source: Copernicus journal article supplement (doi:10.5194/acp-2016-1090), 2017-01-13
Supplement: Supplementary file 1 [file acp-2016-1090-supplement.pdf]

## **Emission factors and light absorption properties of brown carbon from household coal combustion in China**

- 5 Jianzhong Sun<sup>1,2,5</sup>, Guorui Zhi<sup>2\*</sup>, Regina. Hitzenberger<sup>4</sup>, Yingjun Chen<sup>1,3\*</sup>, Chongguo Tian<sup>1</sup>, Yayun Zhang<sup>2,6</sup>, Yanli Feng<sup>7</sup>, Miaomiao Cheng<sup>2</sup>, Yuzhe Zhang<sup>2,6</sup>, Feng Chen<sup>7</sup>, Yiqin Qiu<sup>7</sup>, Zhiming Jiang<sup>7</sup>, Jun Li<sup>8</sup>, Gan Zhang<sup>8</sup>, Yangzhi Mo<sup>8</sup>

<sup>1</sup>Key Laboratory of Coastal Environmental Processes and Ecological Remediation, Yantai Institute of Coastal Zone Research, Chinese Academy of Sciences, Yantai 264003, China

- 10 <sup>2</sup>State Key Laboratory of Environmental Criteria and Risk Assessment, Chinese Research Academy of Environmental Sciences, Beijing 100012, China

<sup>3</sup>State Key Laboratory of Pollution Control and Resources Reuse, Key Laboratory of Cities' Mitigation and Adaptation to Climate Change, College of Environmental Science and Engineering, Tongji University, Shanghai 200092, China

<sup>4</sup>University of Vienna, Faculty of Physics, Boltzmanngasse 5, 1090 Vienna, Austria

- 15 <sup>5</sup>University of Chinese Academy of Sciences, Beijing, 100049, China

<sup>6</sup>College of Chemical Engineering, China University of Petroleum, Beijing 102249, China

<sup>7</sup>Institute of Environmental Pollution and Health, School of Environmental and Chemical Engineering, Shanghai University, Shanghai 200444, China

- 20 <sup>8</sup>State Key Laboratory of Organic Geochemistry, Guangzhou Institute of Geochemistry, Chinese Academy of Sciences, Guangzhou 510640, China

*Correspondence to:* Guorui Zhi (zhigr@craes.org.cn) and Yingjun Chen (yjchentj@tongji.edu.cn)

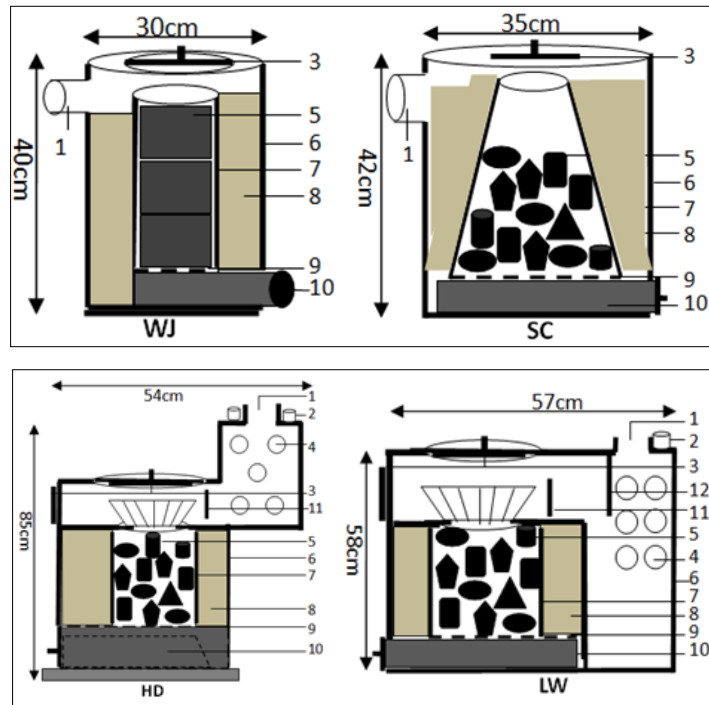

**Figure S1. Cross sections of the selected Chinese residential coal-stoves.**

5 Note: WJ, WanJia brand briquette stove; SC, Simple Chunk stove; HD, HuanDing brand chunk stove; LW, LaoWan brand chunk stove. 1, metal chimney; 2, circulation water; 3, removable lid; 4, circulation water; 5, fuel; 6, iron casting; 7, ceramic cylinder; 8, ceramic fiber for heating insulation; 9, steel grates; 10, air inlet and/or dust bin; 11, adjustable iron baffle; 12, fixed iron baffle.

10 Here are the dimensions of all 4 stoves (Chen et al., 2005; Zhi et al., 2008). Among them, WJ is specifically for honeycomb briquettes and the other three (SC, HD, and LW) are for raw-coal chunks. In addition, the briquette stove WJ and chunk stove SC are of traditional style widely used especially in past decades in China's households for heating rooms through direct thermal radiation. HD and LW are actually mini-boilers of low pressure type used for heating rooms by heated water circulating through a piping system (2, 4). Compared to HD, the LW stove has an additional iron baffle vertically fixed  
 15 before the flue pipe so as to lengthen the time of heat exchange between hot flue gas and circulating water.

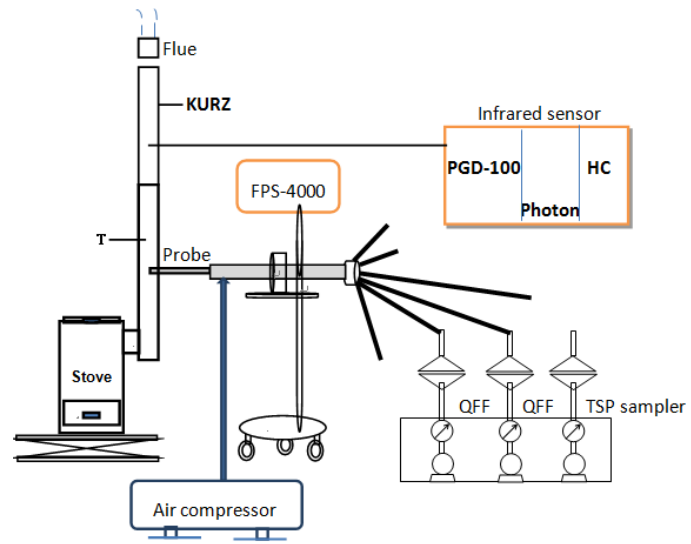

**Figure S2. Diversion-dilution-sampling system.**

## Methods for calculation of EFs (BC and BrC), AAEs, $f_{BrC}(\lambda)$ , and $F_{BrC}$

### (A) EFs

Each EF (g/kg) of BC or BrC can be calculated as follows (Chen et al., 2005; Zhi et al., 2008):

$$EF = CF \times \rho \times A \times 10^{-6} / ((M1 - M2) \times f) \dots\dots\dots(1)$$

5 Where,

CF—conversion factor from measured equivalent of carbon black (CarB) to BC or from measured equivalent of humic acid sodium salt (HASS) to BrC. As described in our manuscript, CF is 1 for the former and is 0.47 for the latter

$\rho$ —the mass of CarB equivalent or HASS equivalent per unit area of sampling filter ( $\mu\text{g}/\text{cm}^2$ )

A—the area of sampling filter ( $\text{cm}^2$ )

10 M1—the mass of coal before combustion (kg)

M2—the mass of coal after combustion (kg)

f—the fraction of sampled flue gas in total flue gas

### (B) AAEs

15 Based on the light absorption at the wavelength pair of 365 and 650 nm measured by the IS method, AAEs are calculated as follows (Krivácsy et al., 2001; Chen and Bond, 2010; Sun et al., 2007; Lukács et al., 2007; Lack et al., 2012; Yuan et al., 2015; Forrister et al., 2015):

$$AAE = \frac{-\ln(A_{650}/A_{365})}{\ln(650/365)} \dots\dots\dots(2)$$

### 20 (C) $f_{BrC}(\lambda)$ and $F_{BrC}$

The spectrally dependent absorbance by BrC ( $ABS_{BrC}(\lambda)$ ) is obtained by subtracting the BC absorbance from the total absorbance (Kirchstetter et al., 2012; Chakrabarty et al., 2014):

$$ABS_{BrC}(\lambda) = ABS_{sum}(\lambda) - ABS_{BC}(\lambda) \dots\dots\dots(3)$$

Then, in each wavelength, the fraction of BrC absorbance in total absorbance ( $f_{BrC}(\lambda)$ ) is calculated as:

25  $f_{BrC}(\lambda) = ABS_{BrC}(\lambda) / ABS_{sum}(\lambda) \dots\dots\dots(4)$

Finally, solar spectrum is considered. The average fraction of absorbed solar radiation by BrC relative to the combined absorption by BrC+BC over the wavelength range from 350 to 850 nm

$$F_{BrC} = \frac{\int_{350}^{850} f_{BrC}(\lambda) k(\lambda) d\lambda}{\int_{350}^{850} k(\lambda) d\lambda} \dots\dots\dots(5)$$

Where  $k(\lambda)$  is the clear sky air mass one global horizontal solar spectrum at the earth's surface (Levinson et al., 2010).

## References

- Chakrabarty, R. K., Pervez, S., Chow, J. C., Watson, J. G., Dewangan, S., Robles, J., and Tian, G.: Funeral Pyres in South Asia: Brown Carbon Aerosol Emissions and Climate Impacts, *Environ. Sci. Technol. Lett.*, 1 (1), 44-48, 10.1021/ez4000669, 2014.
- 5 Chen, Y. and Bond, T. C.: Light absorption by organic carbon from wood combustion, *Atmos. Chem. Phys.*, 10, 1773-1787, 2010.
- Chen, Y., Sheng, G., Bi, X., Feng, Y., Mai, B., and Fu, J.: Emission Factors for Carbonaceous Particles and Polycyclic Aromatic Hydrocarbons from Residential Coal Combustion in China, *Environ. Sci. Technol.*, 39, 1861-1867, 2005.
- Forrister, H., Liu, J., and Scheuer, E.: Evolution of brown carbon in wildfire plumes: Brown Carbon in Biomass Burning  
10 Plumes, *Geophys. Res. Lett.*, 42, 1-8, 10.1002/2015GL063897, 2015.
- Kirchstetter, T. W. and Thatcher, T. L.: Contribution of organic carbon to wood smoke particulate matter absorption of solar radiation, *Atmos. Chem. Phys.*, 12 (14), 6067-6072, 10.5194/acp-12-6067-2012, 2012.
- Krivácsy, Z., Gelencsér, A., Kiss, G., Mészáros, E., Molnár, G., Hoffer, A., Mészáros, T., Sárvari, Z., Temesi, D., and Varga, B.: Study on the Chemical Character of Water Soluble Organic Compounds in Fine Atmospheric Aerosol at the  
15 Jungfraujoch, *J. Atmos. Chem.*, 39 (3), 235-259, 10.1023/A:1010637003083, 2001.
- Lack, D. A., Bahreni, R., Langridge, J. M., Gilman, J. B., and Middlebrook, A. M.: Brown carbon absorption linked to organic mass tracers in biomass burning particles, *Atmos. Chem. Phys. Discuss.*, 12 (11), 29129-29146, 10.5194/acpd-12-29129-2012, 2012.
- Levinson, R., Akbari, H., and Berdahl, P.: Measuring solar reflectance Part II: Review of practical methods, *Solar Energy*, 1-  
20 33, 2010.
- Lukács, H., Gelencsér, A., Hammer, S., Puxbaum, H., Pio, C., Legrand, M., Kasper-Giebl, A., Handler, M., Limbeck, A., Simpson, D., and Preunkert, S.: Seasonal trends and possible sources of brown carbon based on 2-year aerosol measurements at six sites in Europe, *J. Geophys. Res.*, 112 (D23S18), 1-9, 10.1029/2006jd008151, 2007.
- Sun, H., Biedermann, L., and Bond, T. C.: Color of brown carbon: A model for ultraviolet and visible light absorption by  
25 organic carbon aerosol, *Geophys. Res. Lett.*, 34 (L17813), 1-5, 10.1029/2007gl029797, 2007.
- Yuan, J. F., Huang, X. F., Cao, L. M., Cui, J., Zhu, Q., Huang, C. N., Lan, Z. J., and He, L. Y.: Light absorption of brown carbon aerosol in the PRD region of China, *Atmos. Chem. Phys. Discuss.*, 15 (20), 28453-28482, 10.5194/acpd-15-28453-2015, 2015.
- Zhi, G., Chen, Y., Feng, Y., Xiong, S., Li, J., Zhang, G., Sheng, G., and Fu, J.: Emission Characteristics of Carbonaceous  
30 Particles from Various Residential Coal-Stoves in China, *Environ. Sci. Technol.*, 42 (9), 3310-3315, 10.1021/es702247q, 2008.
